# Supplementary material
Source: PubMed Central journal article supplement (PMC5033948)
Supplement: jciinsight-1-86288-s001.pdf [file jciinsight-1-86288-s001.pdf]

## Supplemental Materials

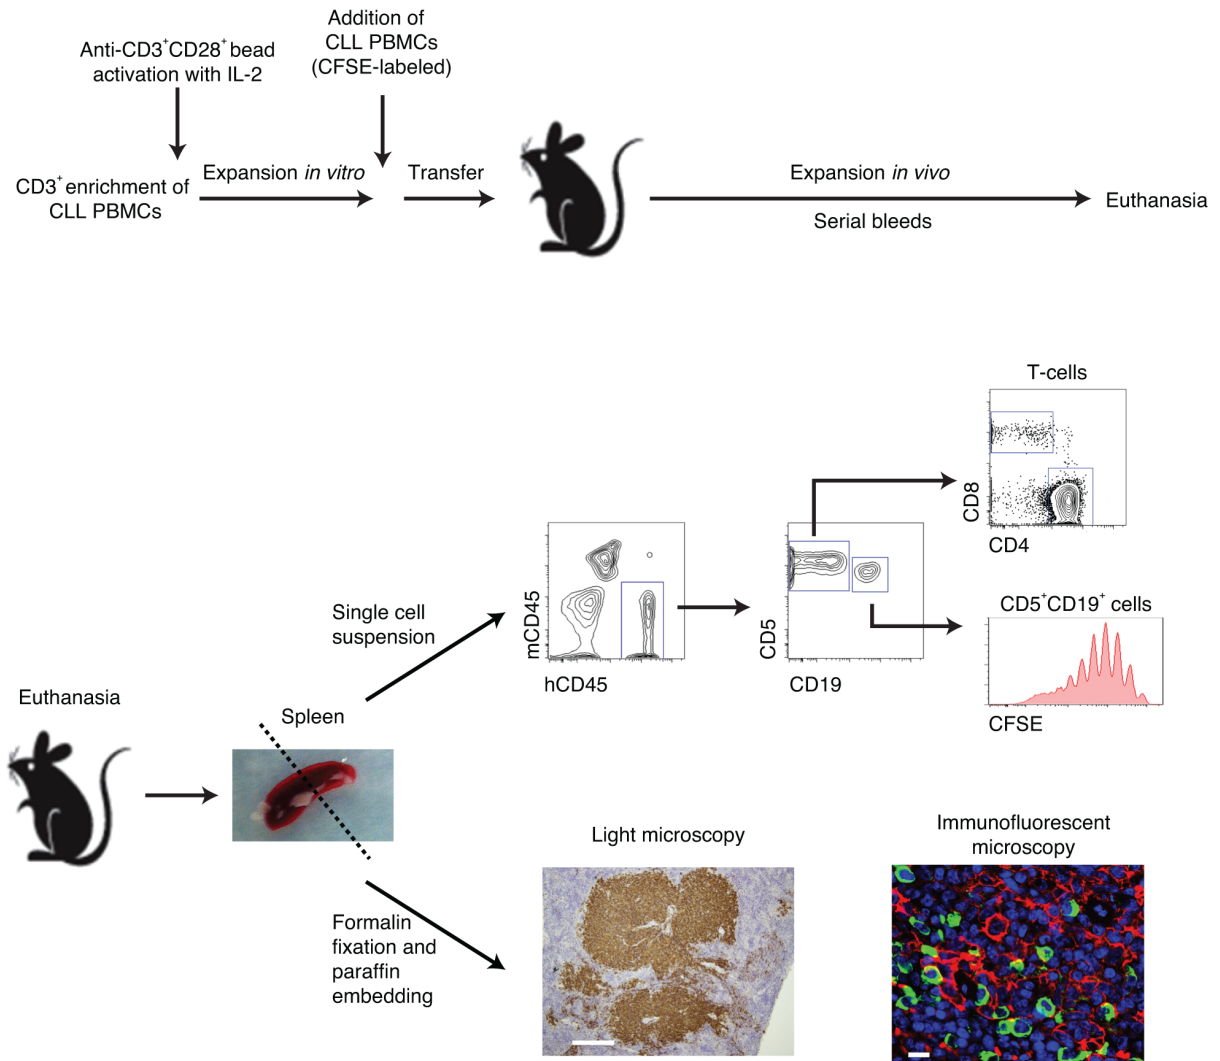

**Figure S1.** The methodology of xenogeneic transplantation is shown in the upper panel. CLL T cells were first obtained using anti-CD3 microbeads and then activated *in vitro* using anti-CD3/CD28 beads and IL-2. Following *in vitro* stimulation, activated CD3<sup>+</sup> cells were mixed with freshly thawed and CFSE-labelled CLL PBMCs and then transferred into NSG mice. Following a period of *in vivo* expansion of both B and T cells (see Table 1 and Table S2), tracked by peripheral blood sampling, mice were euthanized. The lower panel shows the methodology for analysis of splenic tissue by both FC, with the gating strategy indicated for identification of human B and T cells, and by IHC. Note that the gating strategy for identification of human PCs is shown in Figure 1A.

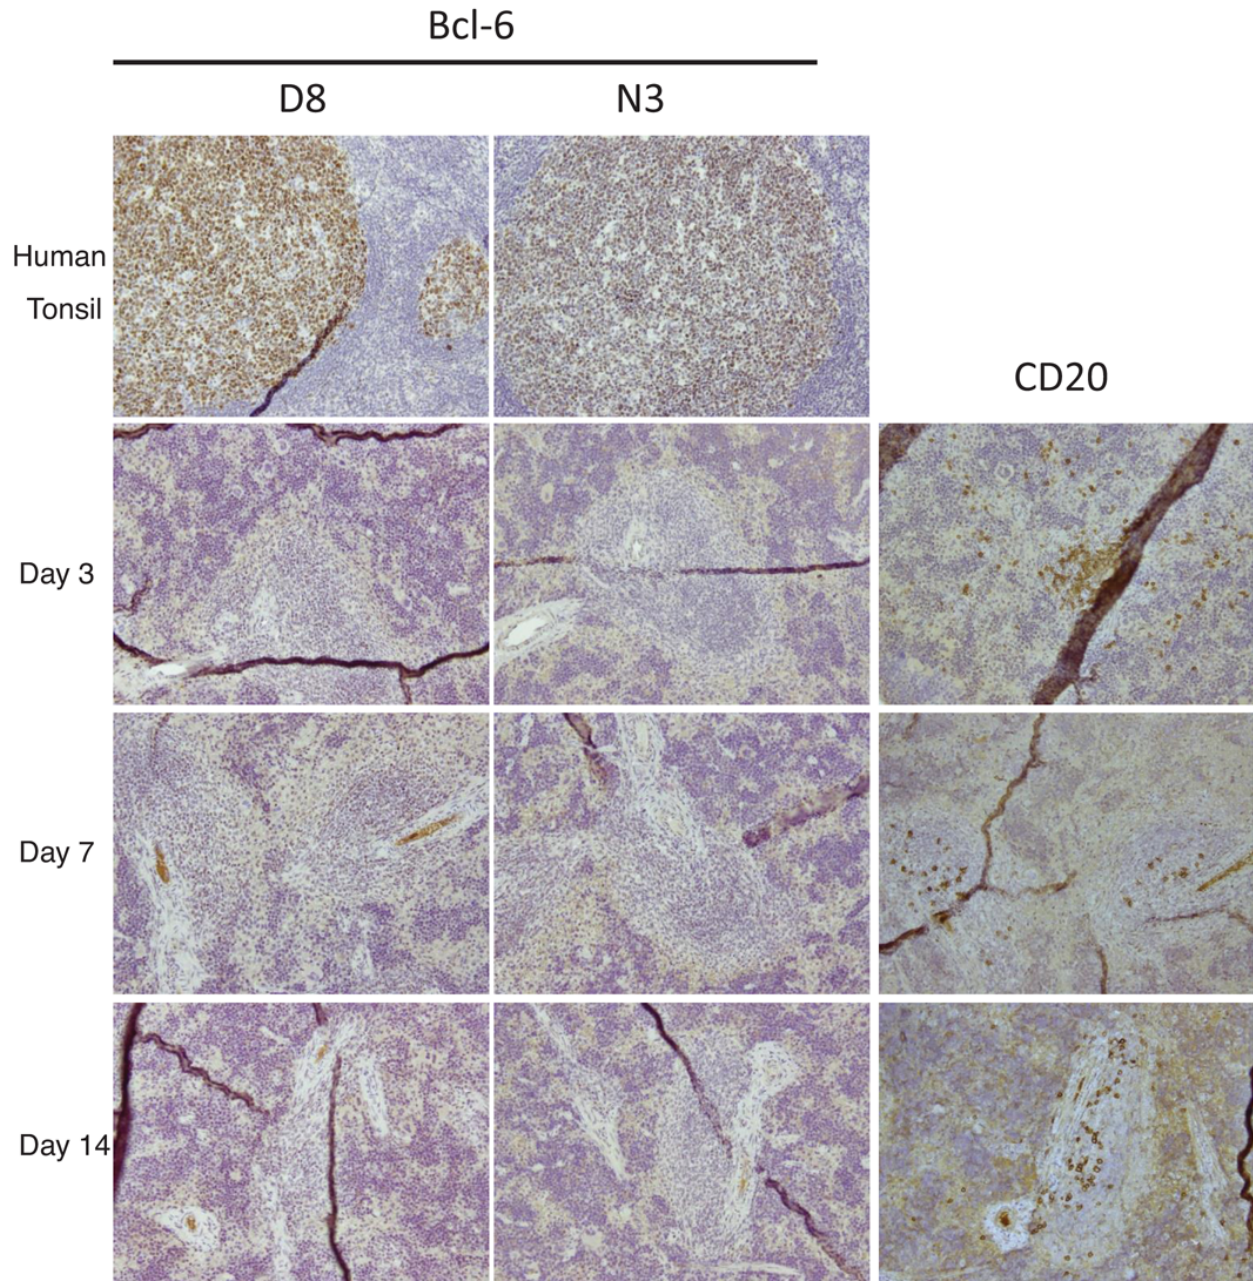

**Figure S2. Bcl-6<sup>+</sup> cells are not found in CD20<sup>+</sup>PAX5<sup>+</sup>PVAs using additional anti-human BCL-6 mAbs.** Human tonsil tissue shows Bcl-6<sup>+</sup> cells within normal GCs with anti-Bcl-6 (clone D-8) and anti-Bcl-6 (clone N-3) mAbs (Santa Cruz). These antibodies do not identify Bcl-6<sup>+</sup> cells in PVAs at days 3, 7 and 14 after xenografting CLL cells.

**Table S1. Ultra Deep Sequencing Data**

| Samples<br>Isotype<br>Pre or Post (mouse number) Transfer | U-CLL 0515 |                 | M-CLL 0854 |                 | U-CLL1083  |                 |
|-----------------------------------------------------------|------------|-----------------|------------|-----------------|------------|-----------------|
|                                                           | IgM<br>Pre | IgM<br>Post (1) | IgM<br>Pre | IgM<br>Post (1) | IgM<br>Pre | IgM<br>Post (1) |
| Total sequence reads                                      | 118,433    | 146,233         | 138,108    | 138,272         | 88,365     | 86,107          |
| Minimum block reads                                       | 87,633     | 97,643          | 75,170     | 90,155          | 37,782     | 32,119          |
| Block read length (bp)                                    | 396/396    | 396/396         | 413/413    | 413/413         | 193/220    | 193/220         |
| Dominant clone reads                                      | 82,935     | 89,556          | 68,625     | 82,092          | 36,774     | 31,306          |
| % Dominant clone / block reads                            | 94.6%      | 91.7%           | 91.3%      | 91.1%           | 97.3%      | 97.5%           |
| Total individual subclones                                | 538        | 810             | 584        | 560             | 171        | 160             |
| New unique subclones                                      | -          | 408             | -          | 120             | -          | 82              |
| Number of new unique subclones                            | -          | 3177            | -          | 404             | -          | 301             |
| Total new unique subclones / block reads                  | -          | 3.25E-02        | -          | 4.48E-03        | -          | 9.37E-03        |
| IGHV-D-J block read length (bp)                           | 316/316    | 316/316         | 333/333    | 333/333         | 193/117    | 193/117         |
| IGHV-D-J mutations in new unique subclones                | -          | 165             | -          | 125             | -          | 74              |
| IGHV-D-J mutation frequency minus background              |            | 6.06E-04        |            | 1.07E-04        |            | 1.90E-03        |
| AID hotspot sites (HS)                                    |            | 36              |            | 41              |            | 34              |
| AID HS mutations                                          |            | 25              |            | 13              |            | 15              |
| Fold AID HS vs random mutation                            |            | 1.3300          |            | 0.8447          |            | 1.8482          |
| AID coldspot sites (CS)                                   |            | 57              |            | 53              |            | 64              |
| AID CS mutations                                          |            | 31              |            | 21              |            | 15              |
| Fold AID CS vs random mutation                            |            | 1.0416          |            | 1.0555          |            | 0.9818          |

Total primer sequence reads are sequences with primer sequence at the 5' end

Minimum block reads = the number of reads with the minimum block read length, total of both forward and reverse.

Block read length = the sequence length of X/Y with X being the forward primer reads and Y being the reverse primer reads. Read lengths do not include primer sequence.

Dominant clone reads = the number of reads identical to original CLL clone.

% Dominant clone / block reads = frequency of dominant clone in the total block reads.

Total individual subclones = number of individual block reads that occur at least 2 times.

New unique subclones = the number of individual subclones Post-transfer that are not found in Pre-transfer sample.

Number of new unique subclones = the total number of new unique subclones sequence reads.

Total new unique subclones / block reads = a measure of the fraction of the total sequence reads represented by new unique subclones.

IGHV-D-J block read length = X/Y with X being the forward primer read and Y being the reverse primer read. All are full length except for the U-CLL1083 sample.

IGHV-D-J mutations in new unique subclones = the number of unique mutations found in *the* IGHV-D-J sequence of new unique subclones.

IGHV-D-J mutation frequency minus background = IGHV-D-J mutations in new unique subclones / (number of new unique subclones x IGHV-D-J bp length) - background.

Background = IGHM mutations in new unique subclones / (number of new unique subclones x IGHM bp length)

AID hotspot sites (HS) = number of WRC or GYW motifs in IGHV-D-J dominant clone sequence.

AID HS mutations = number of unique mutations found at WRC or GYW motifs in IGHV-D-J new unique subclone sequences.

Fold AID HS vs random mutation = (AID HS mutations / IGHV-D-J mutations in new unique subclones) / (AID hotspot sites / IGHV-D-J bp length)

AID coldspot sites (CS) = number of SYC or GRS motifs in IGHV-D-J dominant clone sequence.

AID CS mutations = number of unique mutations found at SYC or GRS motifs in IGHV-D-J new unique subclone sequences.

**Table S1. Ultra Deep Sequencing Data (Continued)**

| Sample Isotype<br>Pre or Post (mouse number) Transfer | U-CLL 1122 |                 |                 |                 |                 |                 |                 |                 |  |
|-------------------------------------------------------|------------|-----------------|-----------------|-----------------|-----------------|-----------------|-----------------|-----------------|--|
|                                                       | IgM<br>Pre | IgM<br>Post (1) | IgG<br>Post (1) | IgM<br>Post (2) | IgG<br>Post (2) | IgM<br>Post (3) | IgM<br>Post (4) | IgM<br>Post (5) |  |
| Total sequence reads                                  | 153,719    | 191,628         | 94,972          | 115,303         | 93,903          | 126,314         | 135,997         | 148,673         |  |
| Minimum block reads                                   | 117,347    | 146,912         | 67,252          | 89,991          | 65,422          | 98,089          | 107,176         | 116,556         |  |
| Block read length (bp)                                | 387/387    | 387/387         | 387/387         | 387/387         | 387/387         | 387/387         | 387/387         | 387/387         |  |
| Dominant clone reads                                  | 110,715    | 135,488         | 43,891          | 81,615          | 50,303          | 89,714          | 95,541          | 100,696         |  |
| % Dominant clone / block reads                        | 94.3%      | 92.2%           | 65.3%           | 90.7%           | 76.9%           | 91.5%           | 89.1%           | 86.4%           |  |
| Total individual subclones                            | 563        | 666             | 910             | 630             | 644             | 600             | 657             | 813             |  |
| New unique subclones                                  | -          | 209             | 208             | 209             | 109             | 163             | 229             | 391             |  |
| Number of new unique subclones                        | -          | 1432            | 1409            | 1191            | 792             | 974             | 2660            | 5787            |  |
| Total new unique subclones / block reads              | -          | 9.75E-03        | 2.10E-02        | 1.32E-02        | 1.21E-02        | 9.93E-03        | 2.48E-02        | 4.96E-02        |  |
| IGHV-D-J block read length (bp)                       | 307/307    | 307/307         | 307/307         | 307/307         | 307/307         | 307/307         | 307/307         | 307/307         |  |
| IGHV-D-J mutations in new unique subclones            | -          | 185             | 176             | 140             | 127             | 141             | 198             | 163             |  |
| IGHV-D-J mutation frequency minus background          |            | 6.11E-04        | 4.83E-04        | 8.66E-04        | 2.48E-03        | 6.70E-04        | 1.18E-03        | 5.91E-04        |  |
| AID hotspot sites (HS)                                |            | 31              | 31              | 31              | 31              | 31              | 31              | 31              |  |
| AID HS mutations                                      |            | 30              | 50              | 21              | 38              | 33              | 40              | 30              |  |
| Fold AID HS vs random mutation                        |            | 1.6059          | 2.8134          | 1.4855          | 2.9632          | 2.3178          | 2.0007          | 1.8227          |  |
| AID coldspot sites (CS)                               |            | 50              | 50              | 50              | 50              | 50              | 50              | 50              |  |
| AID CS mutations                                      |            | 23              | 22              | 15              | 16              | 16              | 30              | 20              |  |
| Fold AID CS vs random mutation                        |            | 0.7634          | 0.7675          | 0.6579          | 0.7735          | 0.6967          | 0.9303          | 0.7534          |  |

**Table S1. Ultra Deep Sequencing Data (Continued)**

| Sample Isotype<br>Pre or Post (mouse number) Transfer | M-CLL 1164 |                 |                 |                 |                 |                 |
|-------------------------------------------------------|------------|-----------------|-----------------|-----------------|-----------------|-----------------|
|                                                       | IgM<br>Pre | IgM<br>Post (1) | IgG<br>Post (1) | IgM<br>Post (2) | IgG<br>Post (2) | IgM<br>Post (3) |
| Total sequence reads                                  | 164,953    | 110,727         | 100,863         | 119,144         | 94,146          | 157,831         |
| Minimum block reads                                   | 124,273    | 78,936          | 69,385          | 20,463          | 59,461          | 112,774         |
| Block read length (bp)                                | 393/393    | 393/393         | 393/393         | 393/393         | 393/393         | 393/393         |
| Dominant clone reads                                  | 119,665    | 74,590          | 39,341          | 17,515          | 34,320          | 98,877          |
| % Dominant clone / block reads                        | 96.3%      | 94.5%           | 56.7%           | 85.6%           | 57.7%           | 87.7%           |
| Total individual subclones                            | 537        | 491             | 737             | 332             | 779             | 740             |
| New unique subclones                                  | -          | 112             | 106             | 137             | 170             | 342             |
| Number of new unique subclones                        | -          | 356             | 557             | 992             | 698             | 1373            |
| Total new unique subclones / block reads              | -          | 4.51E-03        | 8.03E-03        | 4.85E-02        | 1.17E-02        | 1.22E-02        |
| IGHV-D-J block read length (bp)                       | 313/313    | 313/313         | 313/313         | 313/313         | 313/313         | 313/313         |
| IGHV-D-J mutations in new unique subclones            | -          | 115             | 166             | 102             | 183             | 249             |
| IGHV-D-J mutation frequency minus background          |            | 1.38E-03        | 3.11E-03        | 2.20E-03        | 3.26E-03        | 7.91E-04        |
| AID hotspot sites (HS)                                |            | 29              | 29              | 29              | 29              | 29              |
| AID HS mutations                                      |            | 17              | 28              | 20              | 30              | 40              |
| Fold AID HS vs random mutation                        |            | 1.5955          | 1.8205          | 2.1163          | 1.7694          | 1.7338          |
| AID coldspot sites (CS)                               |            | 50              | 50              | 50              | 50              | 50              |
| AID CS mutations                                      |            | 9               | 18              | 3               | 20              | 27              |
| Fold AID CS vs random mutation                        |            | 0.4899          | 0.6788          | 0.1841          | 0.6842          | 0.6788          |

**Table S1. Ultra Deep Sequencing Data (Continued)**

| Samples<br>Isotype<br>Pre or Post (mouse number) Transfer | U-CLL 1279 |                 |                 |                 | M-CLL 1623 |                 |
|-----------------------------------------------------------|------------|-----------------|-----------------|-----------------|------------|-----------------|
|                                                           | IgM<br>Pre | IgM<br>Post (1) | IgG<br>Post (1) | IgA<br>Post (1) | IgM<br>Pre | IgM<br>Post (1) |
| Total sequence reads                                      | 87,867     | 190,772         | 70,197          | 193,676         | 97,678     | 96,292          |
| Minimum block reads                                       | 57,669     | 134,724         | 40,689          | 142,563         | 53,439     | 42,451          |
| Block read length (bp)                                    | 410/410    | 410/410         | 410/410         | 347/347         | 409/409    | 409/409         |
| Dominant clone reads                                      | 54,486     | 125,733         | 29,997          | 127,567         | 50,386     | 40,265          |
| % Dominant clone / block reads                            | 94.5%      | 93.3%           | 73.7%           | 89.5%           | 94.3%      | 94.9%           |
| Total individual subclones                                | 477        | 714             | 517             | 646             | 410        | 362             |
| New unique subclones                                      | -          | 284             | 78              | 256             | -          | 99              |
| Number of new unique subclones                            | -          | 1330            | 647             | 5409            | -          | 584             |
| Total new unique subclones / block reads                  | -          | 9.87E-03        | 1.59E-02        | 3.79E-02        | -          | 1.38E-02        |
| IGHV-D-J block read length (bp)                           | 330/330    | 330/330         | 330/330         | 330/330         | 329/329    | 329/329         |
| IGHV-D-J mutations in new unique subclones                | -          | 254             | 85              | 253             | -          | 107             |
| IGHV-D-J mutation frequency minus background              |            | 2.89E-04        | 8.81E-04        | 5.74E-04        |            | 2.40E-03        |
| AID hotspot sites (HS)                                    |            | 38              | 38              | 38              |            | 28              |
| AID HS mutations                                          |            | 29              | 15              | 37              |            | 11              |
| Fold AID HS vs random mutation                            |            | 0.9915          | 1.5325          | 1.2700          |            | 1.2079          |
| AID coldspot sites (CS)                                   |            | 57              | 57              | 57              |            | 55              |
| AID CS mutations                                          |            | 41              | 8               | 40              |            | 11              |
| Fold AID CS vs random mutation                            |            | 0.9345          | 0.5449          | 0.9153          |            | 0.6150          |

**Table S2**

**Characteristics of CLL samples transferred into mice euthanized at or before 28 days after xenografting**

| <b>Patient sample (Gender)</b> | <b>Ig isotype</b> | <b><i>IGHV</i></b> | <b><i>IGHV</i> mutation status<sup>2</sup></b> | <b>Cytogenetic abnormality defined by FISH</b> | <b>CD38%</b> | <b>Number of NSG recipients</b> | <b>Days at assessment (number of recipients in brackets)</b> |
|--------------------------------|-------------------|--------------------|------------------------------------------------|------------------------------------------------|--------------|---------------------------------|--------------------------------------------------------------|
| 0827(M)                        | Unknown           | 3-23               | M-CLL                                          | none detected                                  | 3.2          | 15                              | 3 (5), 7(5), 14(5)                                           |
| 1024(F)                        | IgM               | 3-30               | M-CLL                                          | none detected                                  | 7.3          | 15                              | 3 (5), 7(5), 14(5)                                           |
| 1083 <sup>1</sup> (M)          | IgM               | 4-38-2             | U-CLL                                          | del13q14.3;<br>del11q23.3                      | 62           | 3                               | 14(1), 21(1), 28(1)                                          |
| 1122 <sup>1</sup> (M)          | IgM               | 3-09               | U-CLL                                          | tri12                                          | 77           | 20                              | 3(5), 7(5), 14(5), 21(5)                                     |
| 1164 <sup>1</sup> (M)          | IgM               | 4-34               | M-CLL                                          | none detected                                  | 99           | 20                              | 3(5), 7(5), 14(5), 21(5)                                     |
| 1301 <sup>1</sup> (M)          | IgM               | 4-31               | U-CLL                                          | tri12                                          | 88           | 3                               | 14(1), 21(1), 28(1)                                          |
| 1523 <sup>1</sup> (M)          | IgM               | 3-48               | U-CLL                                          | del13q14.3                                     | 20           | 2                               | 14(1), 21(1)                                                 |

1: Mice also used for studies with euthanasia after day 28 (see Table 1)

2: M-CLL if *IGHV* sequence is >2% different from most similar germline gene; U-CLL if *IGHV* sequence is ≤2% different from germline gene

**Table S3****Antibodies used for surface labelling and intracellular labelling of cells in FC****Surface labelling**

| Target Antigen | Species | Isotype     | Clone  | Company         | Fluorochrome |
|----------------|---------|-------------|--------|-----------------|--------------|
| CD4            | Mouse   | IgG1        | RPA-T4 | BD Biosciences  | PE           |
| CD4            | Mouse   | IgG1        | RPA-T4 | BD Biosciences  | APC-H7       |
| CD5            | Mouse   | IgG1        | UCHT2  | Biolegend       | PE-Cy7       |
| CD8            | Mouse   | IgG1        | RPA-T8 | BD Biosciences  | V450         |
| CD8            | Mouse   | IgG1        | SK1    | BD Biosciences  | APC-H7       |
| CD8            | Mouse   | IgG1        | SK1    | BD Biosciences  | APC          |
| CD19           | Mouse   | IgG1        | HIB19  | BD Biosciences  | APC          |
| CD19           | Mouse   | IgG1        | J3-119 | Beckman Coulter | ECD          |
| CD38           | Mouse   | IgG1        | HIT2   | BD Biosciences  | A700         |
| CD45 (human)   | Mouse   | IgG1        | H130   | Invitrogen      | PO           |
| CD45 (mouse)   | Rat     | IgG2b (Rat) | 30-F11 | BD Biosciences  | PerCP        |
| CD45 (mouse)   | Rat     | IgG2b (Rat) | 30-F11 | BD Biosciences  | PE-Cy7       |
| CD45 RA        | Mouse   | IgG2b       | H1100  | BD Biosciences  | PE-Cy7       |
| CD57           | Mouse   | IgM         | NK-1   | BD Biosciences  | APC          |
| CD138          | Mouse   | IgG1        | MI15   | BD Biosciences  | CD138        |
| CCR7           | Mouse   | IgG2A       | 150503 | R&D             | PE           |
| CXCR5          | Mouse   | IgG2b       | 51505  | R&D             | FITC         |
| ICOS           | Mouse   | IgG1        | ISA-3  | Ebioscience     | PE-Cy7       |
| PD-1 (CD279)   | Mouse   | IgG1        | MIH4   | Ebioscience     | PE           |

**Intracellular labelling**

| Target Antigen   | Species | Isotype     | Clone                    | Company                |              |
|------------------|---------|-------------|--------------------------|------------------------|--------------|
| Bcl-6            | Mouse   | IgG1        | BCL-UP                   | eBioscience            | APC          |
| T-Bet            | Mouse   | IgG1        | 4B10                     | eBioscience            | PE           |
| AID              | Rat     | IgG2b (Rat) | EK2 5G9                  | Cell signaling         | Unconjugated |
| IFN- $\gamma$    | Mouse   | IgG1        | B27                      | BD Biosciences         | PE           |
| Isotype controls |         |             |                          |                        |              |
| PE-Isotype       | Mouse   | IgG1        | MOPC-21                  | BD Biosciences         | PE           |
| APC-Isotype      | Mouse   | IgG1        | X40                      | BD Biosciences         | APC          |
| PE-Isotype       | Mouse   | IgG1        | P3.6.2.8.1               | eBioscience            | PE           |
| Isotype          | Rat     | IgG2b (Rat) | clone<br>KLH/G2b-1-<br>2 | Southern Biotechnology |              |

Following AID labelling, R-PE-conjugated goat F(ab')<sub>2</sub> anti-rat IgG (H+L) from Southern Biotechnology was used



**Table S4****Antibodies used for microscopy**

| Target Antigen     | Species | Isotype    | Clone    | Company     |
|--------------------|---------|------------|----------|-------------|
| AID                | Mouse   | IgG1       | ZA-001   | Invitrogen  |
| Bcl-6              | Mouse   | IgG1       | PG-B6p   | Dako        |
| Bcl-6              | Mouse   | IgG3       | D-8      | Santa Cruz  |
| Bcl-6              | Rabbit  | Polyclonal | N-3      | Santa Cruz  |
| Bimp-1             | Mouse   | IgG1       | 3H2-E8   | Abcam       |
| CD3                | Rat     | IgG1       | CD3-12   | AbD Serotec |
| CD4                | Mouse   | IgG1       | 4B12     | Leica       |
| CD8                | Mouse   | IgG1       | 1A5      | Leica       |
| CD20               | Mouse   | IgG2a      | L26      | Dako        |
| CD38               | Mouse   | IgG1       | SPC32    | Leica       |
| CD57               | Mouse   | IgM        | TB01     | Dako        |
| CD138              | Mouse   | IgG1       | MI15     | Dako        |
| Human Ig $\lambda$ | Rabbit  | Polyclonal |          | Dako        |
| Human Ig $\kappa$  | Rabbit  | Polyclonal |          | Dako        |
| Human Ig $\gamma$  | Rabbit  | Polyclonal |          | Dako        |
| Human Ig $\mu$     | Rabbit  | Polyclonal |          | Dako        |
| ICOS               | Rabbit  | IgG        | SP98     | Abcam       |
| IRF4               | Mouse   | IgG1       | MUM1p    | Abcam       |
| Ki67               | Mouse   | IgG1       | MIB-1    | Dako        |
| Ki67               | Rabbit  | IgG        | SP6      | Abcam       |
| PAX5               | Mouse   | IgG1       | DAK-Pax5 | Abcam       |
| PD-1               | Mouse   | IgG1       | NAT105   | Abcam       |
| Plasma Cell        | Mouse   | IgG1       | VS38c    | Dako        |
| T-Bet              | Rabbit  | IgG        | EPR9302  | Abcam       |

For light microscopy, antibodies were visualized using the Vectorstain ABC system with ImmPACT DAB substrate and counterstaining with hematoxylin (All Vector Laboratories).

For immunofluorescent microscopy, antibodies were visualized with appropriate donkey whole IgG affinity purified antibodies multiply absorbed against alternate species conjugated to DyLight™ 488, 594 and 649 (All Jackson Immunoresearch).
